# Supplementary material for: Hepatitis B Vaccination in Senegalese Children: Coverage, Timeliness, and Sociodemographic Determinants of Non-Adherence to Immunisation Schedules (ANRS 12356 AmBASS Survey)
Source: MDPI journal article supplement (doi:10.3390/vaccines9050510), 2021-05-15
Supplement: s1 [file s1]

**Table S1.** Factors associated with non-adherence to the hepatitis B virus (HBV) birth dose administration within 7 days of birth in children born on or after 1 January 2016 living in the mostly rural area of Niakhar (*n* = 241 children participating in the ANRS 12356 AmBASS survey with available vaccination data, logistic regression models using weighted and calibrated data).

| Characteristics (% of missing data)                                      | BD received >7 days after birth/not received ( <i>n</i> =101) % | BD received ≤ 7 days after birth ( <i>n</i> =140) % | Univariable analysis |                | Multivariable analysis |                |
|--------------------------------------------------------------------------|-----------------------------------------------------------------|-----------------------------------------------------|----------------------|----------------|------------------------|----------------|
|                                                                          |                                                                 |                                                     | OR [95% CI]          | <i>P</i> value | aOR [95% CI]           | <i>P</i> value |
| <b>Sex (0.0)</b>                                                         |                                                                 |                                                     |                      |                |                        |                |
| Male (ref.)                                                              | 39.1                                                            | 50.0                                                | 1                    | 0.157          |                        |                |
| Female                                                                   | 60.9                                                            | 50.0                                                | 1.56 [0.81–1.98]     |                |                        |                |
| <b>Season of birth (0.0)</b>                                             |                                                                 |                                                     |                      |                |                        |                |
| Wet season (ref.)                                                        | 31.8                                                            | 42.5                                                | 1                    | 0.142          | 1                      | 0.077          |
| Dry season                                                               | 68.2                                                            | 57.5                                                | 1.59 [0.83–3.05]     |                | 1.84 [0.92–3.67]       |                |
| <b>Place of birth (0.0)</b>                                              |                                                                 |                                                     |                      |                |                        |                |
| Healthcare facility (ref.)                                               | 72.9                                                            | 84.3                                                | 1                    | 0.067          | 1                      | 0.045          |
| Home                                                                     | 27.1                                                            | 15.7                                                | 1.99 [0.94–4.20]     |                | 2.29 [1.02–5.13]       |                |
| <b>Birth order (0.7)</b>                                                 |                                                                 |                                                     |                      |                |                        |                |
| 1                                                                        | 21.2                                                            | 16.5                                                | 1.36 [0.61–3.05]     | 0.407          |                        |                |
| ≥2 (ref.)                                                                | 78.8                                                            | 83.5                                                | 1                    |                |                        |                |
| <b>Type of village (0.0)</b>                                             |                                                                 |                                                     |                      |                |                        |                |
| Semi-urban (ref.)                                                        | 56.2                                                            | 60.5                                                | 1                    | 0.580          |                        |                |
| Rural                                                                    | 43.8                                                            | 39.5                                                | 1.19 [0.59–2.40]     |                |                        |                |
| <b>Distance to closest healthcare post (0.7)</b>                         |                                                                 |                                                     |                      |                |                        |                |
| ≤3 km (ref.)                                                             | 68.7                                                            | 72.6                                                | 1                    | 0.574          |                        |                |
| >3 km                                                                    | 31.3                                                            | 27.4                                                | 1.20 [0.58–2.53]     |                |                        |                |
| <b>Mother's age at child's birth (years) (1.5)</b>                       |                                                                 |                                                     |                      |                |                        |                |
| ≤19                                                                      | 7.5                                                             | 5.1                                                 | 1.66 [0.35–7.78]     | 0.729          |                        |                |
| 20–29                                                                    | 49.9                                                            | 46.7                                                | 1.21 [0.65–2.46]     |                |                        |                |
| ≥30 (ref.)                                                               | 42.6                                                            | 48.2                                                | 1                    |                |                        |                |
| <b>Prenatal consultation during mother's most recent pregnancy (9.9)</b> |                                                                 |                                                     |                      |                |                        |                |
| Yes (ref.)                                                               | 98.0                                                            | 94.6                                                | 1                    | 0.259          |                        |                |
| No                                                                       | 2.0                                                             | 5.4                                                 | 0.36 [0.05–2.47]     |                |                        |                |

|                                                               |      |      |                   |       |                   |       |
|---------------------------------------------------------------|------|------|-------------------|-------|-------------------|-------|
| <b>Mother's marital status (11.2)</b>                         |      |      |                   |       |                   |       |
| Married (ref.)                                                | 95.0 | 98.1 | 1                 | 0.264 |                   |       |
| Not married (single, widowed, divorced)                       | 5.0  | 1.9  | 2.72 [0.41-18.18] |       |                   |       |
| <b>Mother's educational level (2.9)</b>                       |      |      |                   |       |                   |       |
| No schooling (ref.)                                           | 65.7 | 69.7 | 1                 |       |                   |       |
| Primary school                                                | 22.7 | 15.9 | 1.52 [0.65-3.58]  | 0.529 |                   |       |
| Secondary school and higher                                   | 11.6 | 14.4 | 0.85 [0.38-1.94]  |       |                   |       |
| <b>Father's educational level (22.6)</b>                      |      |      |                   |       |                   |       |
| No schooling (ref.)                                           | 62.1 | 54.7 | 1                 |       |                   |       |
| Primary school                                                | 25.0 | 24.9 | 0.88 [0.42-1.85]  | 0.664 |                   |       |
| Secondary school and higher                                   | 12.9 | 20.4 | 0.56 [0.14-2.15]  |       |                   |       |
| <b>Household living conditions index <sup>1</sup> (0.0)</b>   |      |      |                   |       |                   |       |
| 1 <sup>st</sup> quartile                                      | 17.5 | 9.95 | 2.37 [0.90-6.28]  |       |                   |       |
| 2 <sup>nd</sup> quartile                                      | 22.9 | 20.7 | 1.49 [0.53-4.21]  |       |                   |       |
| 3 <sup>rd</sup> quartile                                      | 28.4 | 27.2 | 1.41 [0.61-3.27]  | 0.423 |                   |       |
| 4 <sup>th</sup> quartile (ref.)                               | 31.2 | 42.1 | 1                 |       |                   |       |
| <b>Household agricultural wealth index <sup>1</sup> (0.0)</b> |      |      |                   |       |                   |       |
| 1 <sup>st</sup> quartile                                      | 24.0 | 19.5 | 1.53 [0.55-4.25]  |       |                   |       |
| 2 <sup>nd</sup> quartile                                      | 21.7 | 17.3 | 1.56 [0.60-4.03]  |       |                   |       |
| 3 <sup>rd</sup> quartile                                      | 24.5 | 26.4 | 1.15 [0.51-2.57]  | 0.745 |                   |       |
| 4 <sup>th</sup> quartile (ref.)                               | 29.8 | 36.8 | 1                 |       |                   |       |
| <b>Born in 2016 (0.0)</b>                                     |      |      |                   |       |                   |       |
| Yes (ref.)                                                    | 53.8 | 20.6 | 4.50 [2.05-9.86]  | 0.002 | 4.97 [2.21-11.20] | 0.002 |
| No (2017-2018)                                                | 46.2 | 79.4 | 1                 |       | 1                 |       |

OR = odds ratio; Aor = adjusted odds ratio; CI = confidence interval; <sup>1</sup> The household living conditions index and the agricultural wealth index were built using a multiple correspondence analysis of information on durable goods, agricultural and farming resources, and housing characteristics at the household level.

**Table S2.** Factors associated with non-adherence to the three-dose hepatitis B virus (HBV) vaccine schedule (birth dose and two-dose pentavalent, with the birth dose received >7 days/not received) in children born on or after 1 January 2016 living in the mostly rural area of Niakhar (*n* = 241 children participating in the ANRS 12356 AmbASS survey with available vaccination data, logistic regression models using weighted and calibrated data).

| Characteristics (% of missing data)                                      | Non-adherence to the three-dose schedule ( <i>n</i> = 129) | Adherence to the three-dose schedule ( <i>n</i> = 112) | Univariable analysis |         | Multivariable analysis |         |
|--------------------------------------------------------------------------|------------------------------------------------------------|--------------------------------------------------------|----------------------|---------|------------------------|---------|
|                                                                          |                                                            |                                                        | OR [95% CI]          | P value | aOR [95% CI]           | P value |
| <b>Sex (0.0)</b>                                                         |                                                            |                                                        |                      |         |                        |         |
| Male (ref.)                                                              | 42.3                                                       | 48.9                                                   | 1                    |         |                        |         |
| Female                                                                   | 57.5                                                       | 51.1                                                   | 1.29 [0.65–2.59]     | 0.424   |                        |         |
| <b>Season of birth (0.0)</b>                                             |                                                            |                                                        |                      |         |                        |         |
| Wet season (ref.)                                                        | 31.1                                                       | 46.0                                                   | 1                    |         | 1                      |         |
| Dry season                                                               | 68.9                                                       | 54.0                                                   | 1.88 [0.99–3.58]     | 0.054   | 2.43 [1.26–4.69]       | 0.014   |
| <b>Place of birth (0.0)</b>                                              |                                                            |                                                        |                      |         |                        |         |
| Healthcare facility (ref.)                                               | 74.5                                                       | 85.2                                                   | 1                    |         | 1                      |         |
| Home                                                                     | 25.5                                                       | 14.8                                                   | 1.98 [0.91–4.28]     | 0.077   | 2.32 [1.03–5.23]       | 0.045   |
| <b>Birth order (0.7)</b>                                                 |                                                            |                                                        |                      |         |                        |         |
| 1                                                                        | 21.6                                                       | 14.9                                                   | 1.57 [0.69–3.53]     |         |                        |         |
| ≥2 (ref.)                                                                | 78.4                                                       | 85.1                                                   | 1                    | 0.244   |                        |         |
| <b>Type of village (0.0)</b>                                             |                                                            |                                                        |                      |         |                        |         |
| Semi-urban (ref.)                                                        | 59.4                                                       | 57.9                                                   | 1                    |         |                        |         |
| Rural                                                                    | 40.6                                                       | 42.1                                                   | 0.94 [0.48–1.85]     | 0.847   |                        |         |
| <b>Distance to closest healthcare post (0.7)</b>                         |                                                            |                                                        |                      |         |                        |         |
| ≤3 km (ref.)                                                             | 67.4                                                       | 75.0                                                   | 1                    |         | 1                      |         |
| >3 km                                                                    | 32.6                                                       | 25.0                                                   | 1.45 [0.75–2.82]     | 0.236   | 2.02 [0.92–4.43]       | 0.074   |
| <b>Mother's age at child's birth (years) (1.5)</b>                       |                                                            |                                                        |                      |         |                        |         |
| ≤19                                                                      | 8.6                                                        | 2.9                                                    | 3.64 [0.62–21.26]    |         |                        |         |
| 20–29                                                                    | 49.6                                                       | 46.1                                                   | 1.32 [0.70–2.47]     | 0.321   |                        |         |
| ≥30 (ref.)                                                               | 41.8                                                       | 51.0                                                   | 1                    |         |                        |         |
| <b>Prenatal consultation during mother's most recent pregnancy (9.9)</b> |                                                            |                                                        |                      |         |                        |         |
| Yes (ref.)                                                               | 98.4                                                       | 93.3                                                   | 1                    |         |                        |         |
| No                                                                       | 1.6                                                        | 6.7                                                    | 0.22 [0.03–1.49]     | 0.108   |                        |         |
| <b>Mother's marital status (11.2)</b>                                    |                                                            |                                                        |                      |         |                        |         |
| Married (ref.)                                                           | 96.1                                                       | 97.7                                                   | 1                    |         |                        |         |
| Not married (single, widowed, divorced)                                  | 3.9                                                        | 2.3                                                    | 1.70 [0.26–11.30]    | 0.543   |                        |         |
| <b>Mother's educational level (2.9)</b>                                  |                                                            |                                                        |                      |         |                        |         |
| No schooling (ref.)                                                      | 68.5                                                       | 67.5                                                   | 1                    |         |                        |         |
| Primary school                                                           | 19.9                                                       | 17.3                                                   | 1.13 [0.46–2.82]     | 0.731   |                        |         |

|                                                              |      |      |                  |       |                  |       |
|--------------------------------------------------------------|------|------|------------------|-------|------------------|-------|
| Secondary school and above                                   | 11.6 | 15.2 | 0.76 [0.33-1.72] |       |                  |       |
| <b>Father's educational level (22.6)</b>                     |      |      |                  |       |                  |       |
| No schooling (ref.)                                          | 63.1 | 51.5 | 1                |       |                  |       |
| Primary school                                               | 23.6 | 26.5 | 0.73 [0.33-1.60] | 0.532 |                  |       |
| Secondary school and above                                   | 13.3 | 22.0 | 0.35 [0.12-2.00] |       |                  |       |
| <b>Household living conditions index<sup>1</sup> (0.0)</b>   |      |      |                  |       |                  |       |
| 1 <sup>st</sup> quartile                                     | 17.7 | 7.8  | 2.51 [1.03-6.13] |       |                  |       |
| 2 <sup>nd</sup> quartile                                     | 19.7 | 23.8 | 0.92 [0.33-2.55] |       |                  |       |
| 3 <sup>rd</sup> quartile                                     | 26.8 | 28.7 | 1.04 [0.50-2.15] | 0.292 |                  |       |
| 4 <sup>th</sup> quartile (ref.)                              | 35.7 | 39.7 | 1                |       |                  |       |
| <b>Household agricultural wealth index<sup>1</sup> (0.0)</b> |      |      |                  |       |                  |       |
| 1 <sup>st</sup> quartile                                     | 26.6 | 15.5 | 1.97 [0.94-4.15] |       | 3.22 [1.29-8.02] | 0.013 |
| 2 <sup>nd</sup> -4 <sup>th</sup> quartile (ref.)             | 73.4 | 84.5 | 1                | 0.069 | 1                |       |
| <b>Year of birth (0.0)</b>                                   |      |      |                  |       |                  |       |
| 2016                                                         | 46.5 | 20.8 | 3.32 [1.60-6.86] | 0.005 | 3.74 [1.70-8.22] | 0.004 |
| 2017-2018 (ref.)                                             | 53.5 | 79.2 | 1                |       | 1                |       |

OR = odds ratio; aOR= adjusted odds ratio; CI= confidence interval; <sup>1</sup> The household living conditions index and the agricultural wealth index were built using a multiple correspondence analysis of information on durable goods, agricultural and farming resources, and housing characteristics at the household level.

**Table S3.** Factors associated with non-adherence to the four-dose hepatitis B virus (HBV) vaccine schedule in children born on or after 1 January 2016 living in the mostly area of Niakhar (*n* = 241 children participating in the ANRS 12356 AmBASS survey with available vaccination data, logistic regression models using weighted and calibrated data)

| Characteristics (% of missing data) | Non-adherence to the four-dose schedule ( <i>n</i> = 151) | Adherence to the four-dose schedule ( <i>n</i> = 90) | Univariable analysis |                | Multivariable analysis |                |
|-------------------------------------|-----------------------------------------------------------|------------------------------------------------------|----------------------|----------------|------------------------|----------------|
|                                     |                                                           |                                                      | OR [95% CI]          | <i>P</i> value | aOR [95% CI]           | <i>P</i> value |
| <b>Sex (0.0)</b>                    |                                                           |                                                      |                      |                |                        |                |
| Male (ref.)                         | 45.3                                                      | 45.8                                                 | 1                    | 0.946          |                        |                |
| Female                              | 54.7                                                      | 54.2                                                 | 1.02 [0.49–2.16]     |                |                        |                |
| <b>Season of birth (0.0)</b>        |                                                           |                                                      |                      |                |                        |                |
| Wet season (ref.)                   | 34.4                                                      | 44.0                                                 | 1                    | 0.274          |                        |                |
| Dry season                          | 65.6                                                      | 56.0                                                 | 1.49 [0.69–3.26]     |                |                        |                |
| <b>Place of birth (0.0)</b>         |                                                           |                                                      |                      |                |                        |                |
| Healthcare facility (ref.)          | 74.6                                                      | 87.6                                                 | 1                    | 0.037          | 1                      | 0.028          |
| Home                                | 25.4                                                      | 12.4                                                 | 2.41 [1.07–5.42]     |                |                        |                |
| <b>Birth order (0.67)</b>           |                                                           |                                                      |                      |                |                        |                |
| 1                                   | 21.3                                                      | 13.8                                                 | 1.68 [0.71–3.99]     | 0.205          |                        |                |
| ≥2 (ref.)                           | 78.7                                                      | 86.2                                                 | 1                    |                |                        |                |

|                                                                          |      |      |                   |       |                  |       |
|--------------------------------------------------------------------------|------|------|-------------------|-------|------------------|-------|
| <b>Type of village (0.0)</b>                                             |      |      |                   |       |                  |       |
| Semi-urban (ref.)                                                        | 61.2 | 54.6 | 1                 | 0.402 |                  |       |
| Rural                                                                    | 38.8 | 45.4 | 0.76 [0.38–1.53]  |       |                  |       |
| <b>Distance to closest healthcare post (0.7)</b>                         |      |      |                   |       |                  |       |
| ≤3 km (ref.)                                                             | 66.9 | 77.7 | 1                 | 0.083 | 1                | 0.049 |
| >3 km                                                                    | 33.1 | 22.3 | 1.73 [0.92–3.25]  |       | 2.12 [1.00–4.50] |       |
| <b>Mother's age at child's birth (years) (1.52)</b>                      |      |      |                   |       |                  |       |
| ≤19                                                                      | 7.8  | 3.4  | 2.87 [0.47–17.70] | 0.444 |                  |       |
| 20–29                                                                    | 50.1 | 44.6 | 1.39 [0.70–2.76]  |       |                  |       |
| ≥30 (ref.)                                                               | 42.1 | 52.0 | 1                 |       |                  |       |
| <b>Prenatal consultation during mother's most recent pregnancy (8.3)</b> |      |      |                   |       |                  |       |
| Yes (ref.)                                                               | 96.8 | 94.7 | 1                 | 0.534 |                  |       |
| No                                                                       | 3.2  | 5.3  | 0.59 [0.09-3.73]  |       |                  |       |
| <b>Mother's marital status (11.2)</b>                                    |      |      |                   |       |                  |       |
| Married (ref.)                                                           | 95.5 | 99.0 | 1                 | 0.172 |                  |       |
| Not married (single, widowed, divorced)                                  | 4.5  | 1.0  | 4.73 [0.44-50.41] |       |                  |       |
| <b>Mother's educational level (2.9)</b>                                  |      |      |                   |       |                  |       |
| No schooling (ref.)                                                      | 65.6 | 71.9 | 1                 | 0.515 |                  |       |
| Primary school                                                           | 21.4 | 14.3 | 1.63 [0.69–3.88]  |       |                  |       |
| Secondary school and higher                                              | 13.0 | 13.8 | 1.03 [0.43–2.45]  |       |                  |       |
| <b>Father's educational level (22.6)</b>                                 |      |      |                   |       |                  |       |
| No schooling (ref.)                                                      | 62.0 | 51.2 | 1                 | 0.521 |                  |       |
| Primary school                                                           | 25.0 | 24.9 | 0.83 [0.34–2.01]  |       |                  |       |
| Secondary school and higher                                              | 13.0 | 23.9 | 0.45 [0.11–1.88]  |       |                  |       |
| <b>Household living conditions index<sup>1</sup> (0.0)</b>               |      |      |                   |       |                  |       |
| 1 <sup>st</sup> quartile                                                 | 16.8 | 6.9  | 2.36 [0.95–5.86]  | 0.286 |                  |       |
| 2 <sup>nd</sup> quartile                                                 | 19.1 | 25.9 | 0.72 [0.25–2.07]  |       |                  |       |
| 3 <sup>rd</sup> quartile                                                 | 26.1 | 30.3 | 0.84 [0.43–1.64]  |       |                  |       |
| 4 <sup>th</sup> quartile (ref.)                                          | 38.0 | 36.9 | 1                 |       |                  |       |
| <b>Household agricultural wealth index<sup>1</sup> (0.0)</b>             |      |      |                   |       |                  |       |
| 1 <sup>st</sup> quartile                                                 | 26.0 | 13.8 | 2.18 [1.05–4.56]  | 0.039 | 3.59 [1.58–8.18] | 0.007 |

|                                                  |      |      |                  |       |                  |       |
|--------------------------------------------------|------|------|------------------|-------|------------------|-------|
| 2 <sup>nd</sup> –4 <sup>th</sup> quartile (ref.) | 74.0 | 86.2 | 1                |       | 1                |       |
| <b>Year of birth (0.0)</b>                       |      |      |                  |       |                  |       |
| 2016                                             | 43.0 | 20.5 | 2.93 [1.31–6.54] | 0.014 | 3.09 [1.29–7.39] | 0.017 |
| 2017–2018 (ref.)                                 | 57.0 | 79.5 | 1                |       | 1                |       |

OR = odds ratio; aOR= adjusted odds ratio ; CI= confidence interval; <sup>1</sup> The household living conditions index and the agricultural wealth index were built using a multiple correspondence analysis of information on durable goods, agricultural and farming resources, and housing characteristics at the household level.
